# Supplementary material for: Mg-modified ultra-stable Y type zeolite for the rapid catalytic co-pyrolysis of low-rank coal and biomass
Source: Royal Society of Chemistry journal article supplement (doi:10.1039/c5ra24395e), 2015-12-22
Supplement: c5ra24395e1.pdf [file c5ra24395e1.pdf]

## Supplementary data

for

### **Mg-modified ultra-stable Y type zeolite for the rapidly catalytic copyrolysis of low-rank coal and biomass**

Jenny Rizkiana<sup>1</sup>, Guoqing Guan<sup>1,2\*</sup>, Wahyu bambang Widayatno<sup>1</sup>, Jingxuan Yang<sup>2,3</sup>,  
Xiaogang Hao<sup>3</sup>, Koichi Matsuoka<sup>4</sup>, Abuliti Abudula<sup>1,2\*</sup>

<sup>1</sup>*Graduate School of Science and Technology, Hirosaki University, 1-Bunkyocho,  
Hirosaki 036-8560, Japan*

<sup>2</sup>*North Japan Research Institute for Sustainable Energy (NJRISE), Hirosaki University,  
2-1-3 Matsubara, Aomori 030-0813, Japan*

<sup>3</sup>*Department of Chemical Engineering, Taiyuan University of Technology, Taiyuan  
030024, China*

<sup>4</sup>*Hydrocarbon Conversion Process Group, Research Institute of Energy Frontier,  
National Institute of Advanced Industrial Science and Technology, Tsukuba, Ibaraki  
305-8569, Japan*

\*Corresponding authors: *Tel.: +81 17 762 7756; E-mails: guan@hirosaki-u.ac.jp (G. Guan); abuliti@hirosaki-u.ac.jp (A. Abudula)*

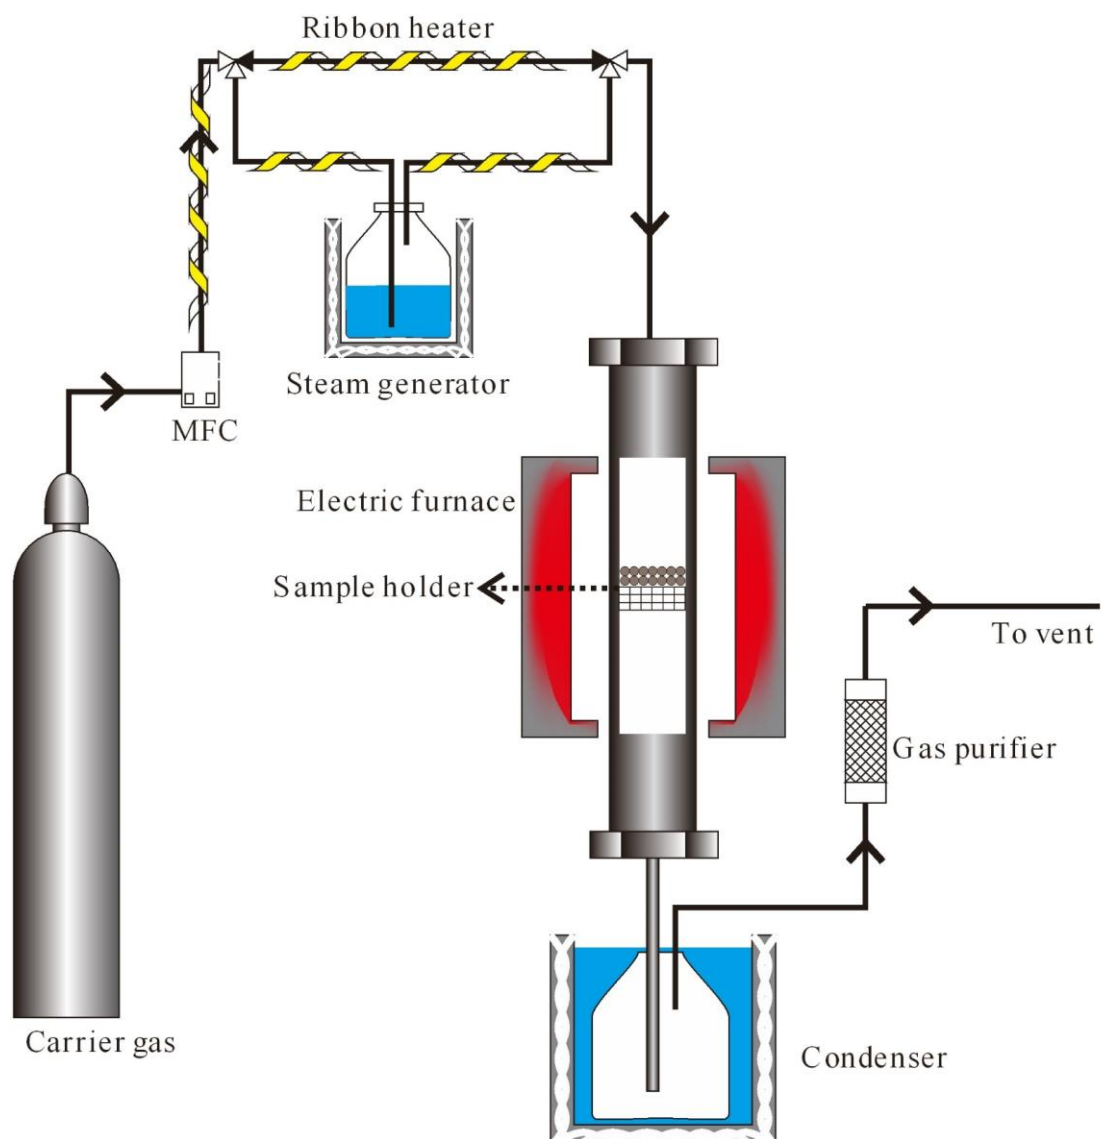

**Fig.S1** Schematic diagram of a fixed bed reactor for steaming process.

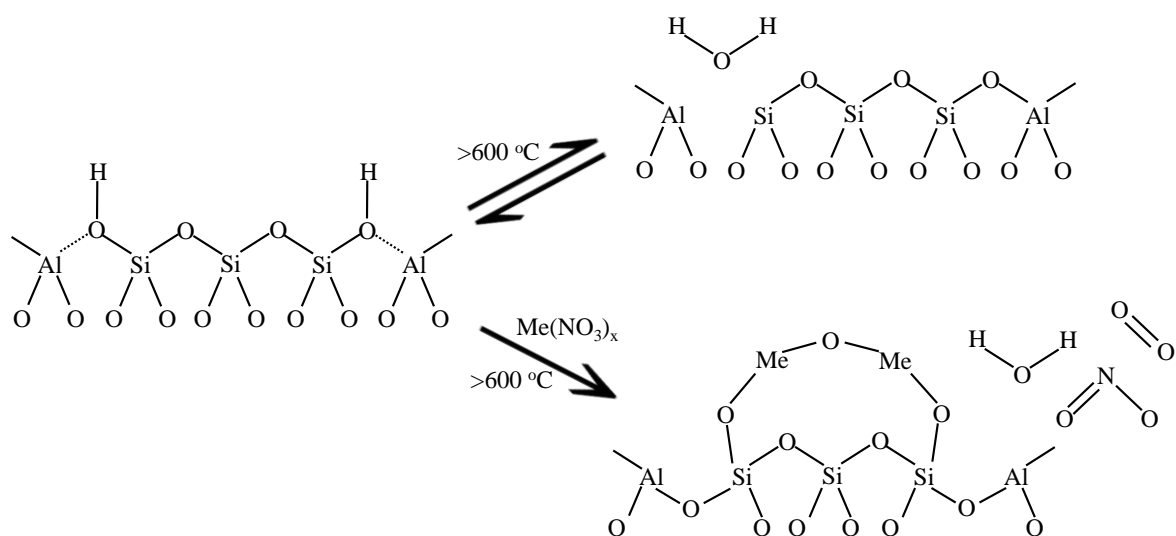

**Fig.S2** The change of zeolite structure due to calcination with and without the presence of metal nitrate.

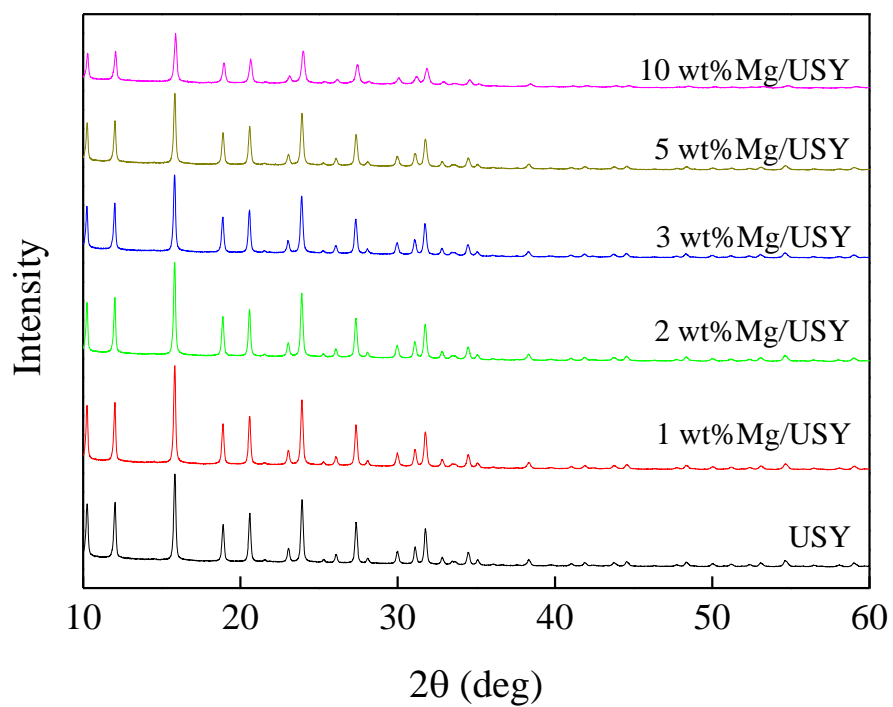

**Fig.S3** XRD spectra of Mg/USY zeolites with various Mg loading amounts.

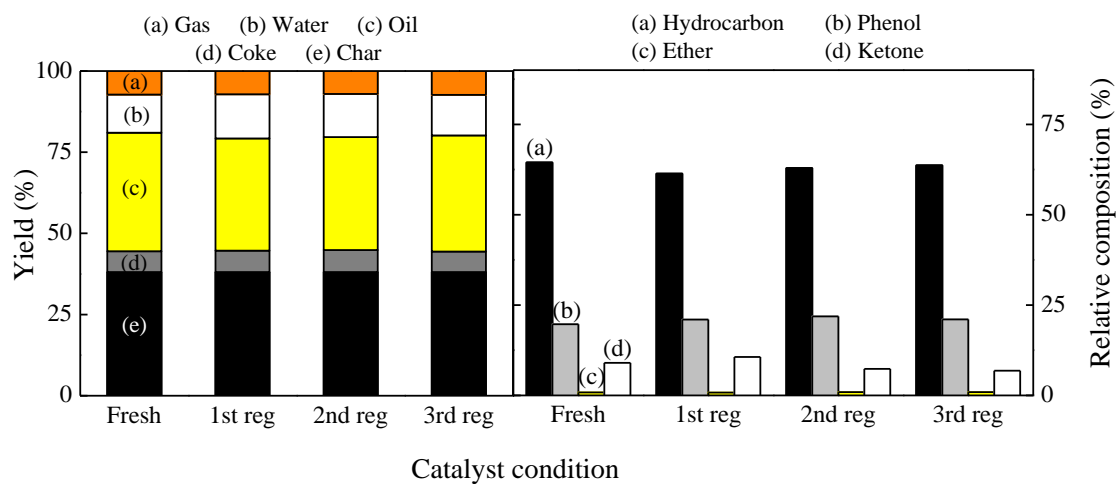

**Fig.S4** Catalytic performance of regenerated Cu/USY zeolite.

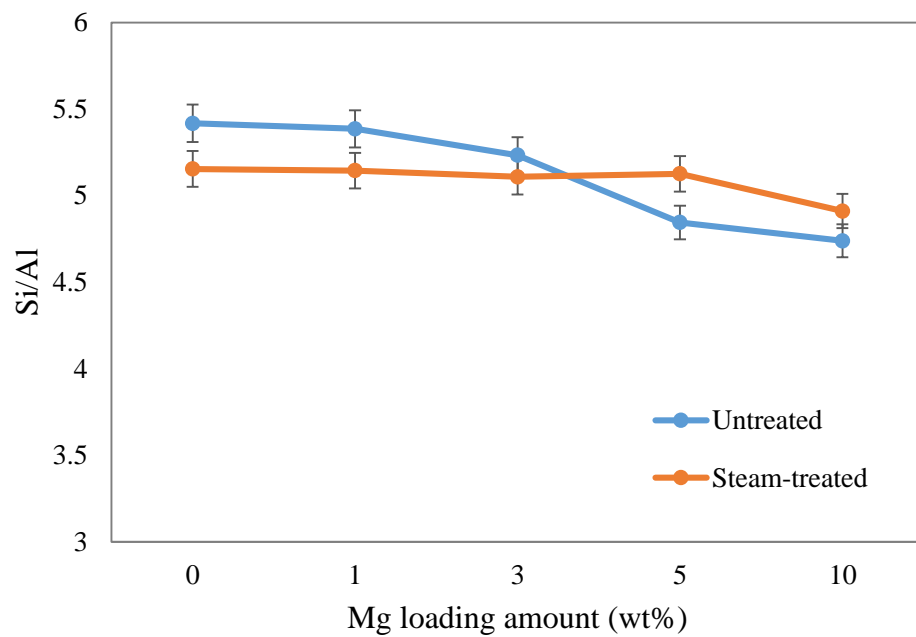

**Fig.S5** Si/Al ratio on the surface of Mg loaded zeolite before and after treatment by steaming process.

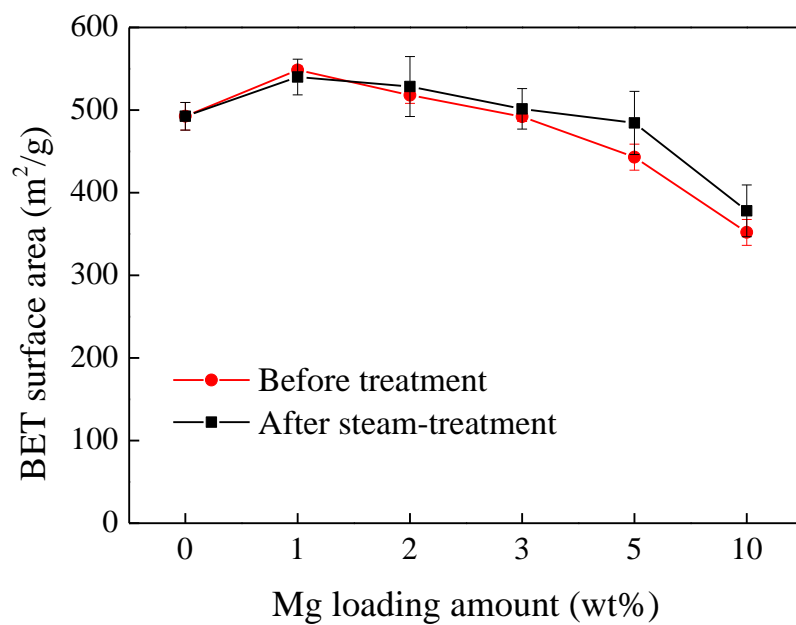

**Fig.S6** The BET surface areas of Mg modified USY zeolite before and after steaming process.
